# Supplementary material for: Seasonal Changes in the Plant Growth-Inhibitory Effects of Rosemary Leaves on Lettuce Seedlings
Source: MDPI journal article supplement (doi:10.3390/plants11050673), 2022-03-01
Supplement: s1 [file s1]

## Article

# Seasonal Changes in the Plant Growth-Inhibitory Effects of Rosemary Leaves on Lettuce Seedlings

Kwame Sarpong Appiah <sup>1,2,\*</sup>, Richard Ansong Omari <sup>3,4</sup>, Siaw Onwona-Agyeman <sup>5</sup>, Christiana Adukwei Amoatey <sup>2</sup>, John Ofofu-Anim <sup>6</sup>, Abderrazak Smaoui <sup>7</sup>, Abdelkarim Ben Arfa <sup>8</sup>, Yoko Suzuki <sup>9</sup>, Yosei Oikawa <sup>1</sup>, Shin Okazaki <sup>1</sup>, Keisuke Katsura <sup>1</sup>, Hiroko Isoda <sup>10</sup>, Kiyokazu Kawada <sup>10,\*</sup> and Yoshiharu Fujii <sup>1</sup>

<sup>1</sup> Department of International Innovative Agricultural Science, Tokyo University of Agriculture and Technology, 3-5-8 Saiwaicho, Fuchu, Tokyo 183-8509, Japan; yosei@cc.tuat.ac.jp (Y.O.); sokazaki@cc.tuat.ac.jp (S.O.); kkatsura@go.tuat.ac.jp (K.K.); yfujii@cc.tuat.ac.jp (Y.F.)

<sup>2</sup> Department of Crop Science, College of Basic and Applied Science, University of Ghana, Legon, Accra P.O. Box LG 44, Ghana; camoatey@ug.edu.gh

<sup>3</sup> Leibniz Centre for Agricultural Landscape Research, Institute of Land Use Systems, Eberswalder Str. 84, 15374 Muencheberg, Germany; talk2jafakingonline@gmail.com

<sup>4</sup> Institute of Agriculture and Horticulture, Faculty of Life Science, Humboldt-University of Berlin, Albrecht-Thaer-Weg 5, 14195 Berlin, Germany

<sup>5</sup> Institute of Agriculture, Tokyo University of Agriculture and Technology, 3-5-8 Saiwaicho, Fuchu, Tokyo 183-8509, Japan; agyeman@cc.tuat.ac.jp

<sup>6</sup> School of Architecture and Science, Central University, Tema P.O. Box 2305, Ghana; jofosuanim@gmail.com

<sup>7</sup> Centre of Biotechnology of Borj Cédria, BP 901 Hammam-Lif, Borj Cedria 2025, Tunisia; abderrazak.smaoui@gmail.com

<sup>8</sup> L'Institut des Régions Arides, Route du Djorf Km 22.5, Médenine 4119, Tunisia; abdelkarim.benarfa@ira.rnrt.tn

<sup>9</sup> Aromatic Repos, AHOLA, A2 Soleil Jiyugaoka, 1-21-3, Jiyugaoka, Meguro, Tokyo 152-0035, Japan; yoko86252539@gmail.com

<sup>10</sup> School of Life and Environmental Sciences, University of Tsukuba, Tennoudai 1-1-1, Tsukuba, Ibaraki 305-8572, Japan; isoda.hiroko.ga@u.tsukuba.ac.jp

\* Correspondence: ksappiah90@gmail.com (K.S.A.); kawada.kiyokazu.gu@u.tsukuba.ac.jp (K.K.)

**Citation:** Appiah, K.S.; Omari, R.A.; Onwona-Agyeman, S.; Amoatey, C.A.; Ofofu-Anim, J.; Smaoui, A.; Arfa, A.B.; Suzuki, Y.; Oikawa, Y.; Okazaki, S.; et al. Seasonal Changes in the Plant Growth-Inhibitory Effects of Rosemary Leaves on Lettuce Seedlings. *Plants* **2022**, *11*, 673. <https://doi.org/10.3390/plants11050673>

Academic Editors: Sofia Rhizopoulou, Maria Karatassiou and Efi Levizou

Received: 30 January 2022

Accepted: 24 February 2022

Published: 1 March 2022

**Publisher's Note:** MDPI stays neutral with regard to jurisdictional claims in published maps and institutional affiliations.

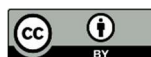

**Copyright:** © 2022 by the authors. Licensee MDPI, Basel, Switzerland. This article is an open access article distributed under the terms and conditions of the Creative Commons Attribution (CC BY) license (<https://creativecommons.org/licenses/by/4.0/>).

**Table S1.** The effects of rosemary leaves collected at different seasons and locations on lettuce growth elongation.

| Sample period<br>(month, year) | Location | Sample Codes   | Growth elongation (% of control) at different concentrations |       |                         |      |                         |      |                         |      |                        |      |                                      |     |
|--------------------------------|----------|----------------|--------------------------------------------------------------|-------|-------------------------|------|-------------------------|------|-------------------------|------|------------------------|------|--------------------------------------|-----|
|                                |          |                | 0.5 mg mL <sup>-1</sup>                                      |       | 1.0 mg mL <sup>-1</sup> |      | 3.0 mg mL <sup>-1</sup> |      | 5.0 mg mL <sup>-1</sup> |      | 10 mg mL <sup>-1</sup> |      | EC <sub>50</sub> mg mL <sup>-1</sup> |     |
|                                |          |                | R                                                            | H     | R                       | H    | R                       | H    | R                       | H    | R                      | H    | R                                    | H   |
| June 2011                      | Fahs     | UT-ARENA 00327 | 109.7                                                        | 86.0  | 80.0                    | 51.4 | 43.8                    | 45.8 | 39.3                    | 45.8 | 23.8                   | 31.8 | 5.1                                  | 4.4 |
|                                |          | UT-ARENA 00334 | 118.8                                                        | 79.5  | 103.4                   | 48.4 | 71.7                    | 44.3 | 47.8                    | 38.5 | 30.4                   | 30.3 | 6.6                                  | 3.6 |
|                                |          | UT-ARENA 00340 | 120.5                                                        | 100.7 | 116.3                   | 67.9 | 61.1                    | 48.1 | 41.0                    | 45.3 | 29.3                   | 36.8 | 6.3                                  | 5.8 |
|                                |          | UT-ARENA 00349 | 80.3                                                         | 58.0  | 67.0                    | 53.0 | 39.0                    | 41.0 | 31.4                    | 37.0 | 22.0                   | 33.0 | 3.5                                  | 1.6 |
|                                |          | UT-ARENA 00357 | 115.4                                                        | 94.1  | 96.6                    | 46.6 | 41.9                    | 47.5 | 32.2                    | 42.4 | 24.5                   | 31.4 | 5.3                                  | 4.4 |
|                                | Matmata  | UT-ARENA 00364 | 119.7                                                        | 80.5  | 100.8                   | 65.5 | 57.1                    | 58.6 | 39.8                    | 49.4 | 28.6                   | 36.8 | 6.0                                  | 6.0 |
|                                |          | UT-ARENA 00371 | 106.5                                                        | 52.5  | 91.5                    | 45.9 | 55.1                    | 40.2 | 38.4                    | 39.3 | 26.5                   | 32.0 | 5.7                                  | 3.5 |
|                                |          | UT-ARENA 00379 | 116.9                                                        | 61.5  | 86.4                    | 48.4 | 67.6                    | 45.9 | 51.5                    | 42.6 | 36.0                   | 37.7 | 6.9                                  | 2.5 |
|                                |          | UT-ARENA 00387 | 86.9                                                         | 69.5  | 72.9                    | 43.5 | 44.9                    | 37.4 | 31.2                    | 35.1 | 25.2                   | 28.2 | 4.3                                  | 1.6 |
|                                |          | UT-ARENA 00395 | 120.2                                                        | 82.7  | 118.1                   | 58.6 | 57.1                    | 42.1 | 33.0                    | 36.1 | 26.6                   | 31.6 | 5.9                                  | 4.0 |
| September 2011                 | Fahs     | UT-ARENA 00402 | 76.4                                                         | 48.9  | 57.5                    | 43.8 | 28.5                    | 34.3 | 22.5                    | 30.7 | 14.5                   | 22.6 | 2.1                                  | 1.5 |
|                                |          | UT-ARENA 00411 | 102.6                                                        | 82.5  | 94.7                    | 58.3 | 36.8                    | 24.7 | 28.2                    | 22.4 | 22.5                   | 20.2 | 4.7                                  | 2.3 |
|                                |          | UT-ARENA 00417 | 104.1                                                        | 81.1  | 80.4                    | 43.3 | 46.5                    | 37.8 | 37.3                    | 37.8 | 32.1                   | 32.3 | 5.4                                  | 2.8 |
|                                |          | UT-ARENA 00426 | 96.8                                                         | 82.3  | 61.8                    | 48.5 | 39.2                    | 37.7 | 28.8                    | 36.2 | 16.5                   | 26.9 | 3.7                                  | 3.0 |
|                                |          | UT-ARENA 00434 | 93.6                                                         | 71.3  | 66.1                    | 52.1 | 45.0                    | 47.9 | 29.9                    | 37.2 | 18.7                   | 33.0 | 4.0                                  | 3.4 |
|                                | Matmata  | UT-ARENA 00442 | 105.7                                                        | 72.0  | 96.8                    | 60.6 | 53.7                    | 40.2 | 50.5                    | 40.2 | 26.3                   | 27.3 | 6.0                                  | 3.4 |
|                                |          | UT-ARENA 00453 | 105.9                                                        | 59.8  | 77.1                    | 43.9 | 39.9                    | 40.9 | 33.3                    | 31.8 | 23.5                   | 26.5 | 4.7                                  | 0.7 |
|                                |          | UT-ARENA 00460 | 103.6                                                        | 61.4  | 92.4                    | 38.6 | 45.5                    | 39.4 | 40.0                    | 27.3 | 20.4                   | 21.2 | 5.1                                  | 1.6 |
|                                |          | UT-ARENA 00469 | 114.4                                                        | 93.3  | 106.7                   | 65.0 | 82.0                    | 50.0 | 46.5                    | 40.0 | 44.7                   | 41.7 | 7.7                                  | 5.8 |
|                                |          | UT-ARENA 00478 | 97.3                                                         | 82.4  | 90.0                    | 49.6 | 45.5                    | 42.9 | 45.2                    | 42.0 | 36.9                   | 28.6 | 6.1                                  | 3.7 |
| November 2011                  | Fahs     | UT-ARENA 00515 | 107.2                                                        | 66.9  | 86.5                    | 41.2 | 41.8                    | 34.6 | 29.9                    | 31.6 | 20.4                   | 22.8 | 4.7                                  | 3.9 |
|                                |          | UT-ARENA 00523 | 93.6                                                         | 77.3  | 77.6                    | 46.2 | 33.9                    | 36.4 | 25.8                    | 28.8 | 19.7                   | 25.0 | 4.0                                  | 2.2 |
|                                |          | UT-ARENA 00535 | 108.6                                                        | 56.1  | 78.7                    | 38.6 | 42.5                    | 34.1 | 35.5                    | 31.1 | 23.9                   | 28.0 | 4.9                                  | 1.8 |
|                                |          | UT-ARENA 00543 | 106.4                                                        | 50.8  | 92.1                    | 47.5 | 45.3                    | 42.4 | 37.1                    | 37.3 | 19.5                   | 29.7 | 5.0                                  | 3.7 |
|                                |          | UT-ARENA 00550 | 107.8                                                        | 97.2  | 96.0                    | 64.6 | 46.2                    | 51.0 | 28.2                    | 38.5 | 20.9                   | 28.1 | 5.0                                  | 4.9 |
|                                | Matmata  | UT-ARENA 00559 | 95.5                                                         | 48.9  | 79.8                    | 38.5 | 41.4                    | 39.3 | 40.2                    | 43.7 | 24.2                   | 25.9 | 4.9                                  | 2.2 |
|                                |          | UT-ARENA 00565 | 94.8                                                         | 54.1  | 77.6                    | 55.9 | 49.7                    | 44.1 | 35.7                    | 41.4 | 17.5                   | 26.1 | 4.6                                  | 2.1 |
|                                |          | UT-ARENA 00574 | 106.4                                                        | 62.4  | 69.6                    | 40.6 | 41.9                    | 36.1 | 33.7                    | 32.3 | 21.1                   | 26.3 | 4.5                                  | 3.9 |
|                                |          | UT-ARENA 00583 | 90.9                                                         | 53.7  | 62.5                    | 33.6 | 36.9                    | 32.9 | 28.0                    | 26.8 | 21.6                   | 23.5 | 3.6                                  | 3.0 |
|                                |          | UT-ARENA 00587 | 122.1                                                        | 75.7  | 105.2                   | 50.4 | 50.6                    | 45.2 | 44.2                    | 37.4 | 32.9                   | 28.7 | 6.3                                  | 3.2 |
| February 2012                  | Fahs     | UT-ARENA 00617 | 123.4                                                        | 98.6  | 87.6                    | 75.6 | 59.3                    | 48.3 | 38.0                    | 32.3 | 28.3                   | 27.9 | 6.7                                  | 5.7 |
|                                |          | UT-ARENA 00622 | 115.2                                                        | 98.6  | 92.3                    | 62.3 | 55.3                    | 42.3 | 31.1                    | 31.8 | 25.3                   | 26.6 | 7.9                                  | 5.7 |
|                                |          | UT-ARENA 00628 | 110.1                                                        | 71.8  | 94.0                    | 55.5 | 47.4                    | 44.5 | 35.1                    | 39.1 | 25.0                   | 28.2 | 5.4                                  | 3.4 |
|                                |          | UT-ARENA 00633 | 110.2                                                        | 88.9  | 85.3                    | 60.3 | 58.3                    | 49.3 | 24.7                    | 29.9 | 39.3                   | 26.3 | 6.5                                  | 5.7 |
|                                |          | UT-ARENA 00638 | 112.3                                                        | 95.3  | 96.3                    | 68.6 | 58.3                    | 45.6 | 26.2                    | 28.9 | 32.9                   | 30.6 | 8.6                                  | 5.9 |
|                                | Matmata  | UT-ARENA 00647 | 110.1                                                        | 58.2  | 85.9                    | 40.4 | 40.3                    | 39.7 | 36.9                    | 31.9 | 20.5                   | 25.5 | 5.0                                  | 7.3 |
|                                |          | UT-ARENA 00652 | 101.4                                                        | 72.9  | 81.9                    | 58.3 | 61.2                    | 53.1 | 40.2                    | 45.8 | 29.7                   | 40.6 | 5.8                                  | 5.4 |
|                                |          | UT-ARENA 00657 | 117.1                                                        | 78.6  | 100.6                   | 70.2 | 55.1                    | 58.3 | 42.0                    | 53.6 | 31.0                   | 40.5 | 6.1                                  | 6.7 |
|                                |          | UT-ARENA 00662 | 111.4                                                        | 79.0  | 102.2                   | 59.0 | 59.0                    | 46.7 | 42.4                    | 42.9 | 28.8                   | 34.3 | 6.9                                  | 4.5 |
|                                |          | UT-ARENA 00667 | 118.2                                                        | 98.3  | 80.3                    | 62.6 | 60.3                    | 45.6 | 37.2                    | 30.8 | 18.3                   | 15.6 | 2.8                                  | 3.7 |

R: Radicle % of control, H: Hypocotyl % of control, EC<sub>50</sub>: Effective concentration to cause half-maximal inhibition.

**Table S2:** Moran's I Statistic

| Variable                                                         | Moran's I | Expected (I) | sd       | <i>p</i> -value |
|------------------------------------------------------------------|-----------|--------------|----------|-----------------|
| Temperature                                                      | -0.043124 | -0.14286     | 0.184716 | 0.5892478       |
| Precipitation                                                    | -0.459758 | -0.14286     | 0.176211 | 0.0721109       |
| CA amount                                                        | -0.036888 | -0.14286     | 0.167392 | 0.5266963       |
| EC <sub>50</sub> (Radicle)                                       | -0.142857 | -0.14286     | 0.156981 | 0.1862481       |
| EC <sub>50</sub> (Hypocotyl)                                     | -0.62431  | -0.14286     | 0.171675 | 0.0050405       |
| <i>p</i> - value > 0.05 means absence of spatial autocorrelation |           |              |          |                 |

Null Hypothesis: Spatial Randomization/Zero spatial autocorrelation
